# Supplementary material
Source: PubMed Central journal article supplement (PMC6277252)
Supplement: supp_6.4.E587_2018-0069-1-at.pdf [file supp_6.4.E587_2018-0069-1-at.pdf]

## Appendix 1: Supplementary data tables

| <b>Table S1: Variance inflation factors for final model</b> |                                  |
|-------------------------------------------------------------|----------------------------------|
|                                                             | <b>Variance inflation factor</b> |
| Age                                                         | 1.53                             |
| Male sex                                                    | 1.19                             |
| Charlson Comorbidity Index                                  | 1.22                             |
| Presence of home support worker                             | 1.42                             |
| PCP appointment booked prior to discharge                   | 1.37                             |
| Familiar PCP                                                | 1.44                             |
| Specialist appointment booked prior to discharge            | 1.12                             |
| Discharge summary reminder                                  | 1.62                             |

| <b>Table S2: Comparison of excluded patients with study population</b> |                                      |                           |                |
|------------------------------------------------------------------------|--------------------------------------|---------------------------|----------------|
| <b>Characteristic</b>                                                  | <b>Included patients<br/>n = 214</b> | <b>Unknown<br/>n = 86</b> | <b>p-value</b> |
| <b>Patient characteristics</b>                                         |                                      |                           |                |
| Age, yr, mean $\pm$ SD                                                 | 70 $\pm$ 16                          | 70 $\pm$ 17               | .88            |
| Male sex                                                               | 122 (57)                             | 52 (60)                   | .58            |
| <b>Discharge diagnosis</b>                                             |                                      |                           |                |
| CHF                                                                    | 40 (19)                              | 18 (21)                   | .66            |
| CAP                                                                    | 18 (8.4)                             | 2 (2.3)                   | .056           |
| COPD                                                                   | 16 (7.5)                             | 11 (13)                   | .15            |
| Charlson Comorbidity index, mean $\pm$ SD                              | 2.6 $\pm$ 2.0                        | 2.7 $\pm$ 2.0             | .91            |
| Length of stay, d, mean $\pm$ SD (median)                              | 8.6 $\pm$ 9.4 (6)                    | 6.9 $\pm$ 5.1<br>(5.5)    | .12            |
| ED visits in past 6 months, mean $\pm$ SD                              | 1.0 $\pm$ 1.9                        | 1.7 $\pm$ 2.6             | .029*          |
| Cognitively impaired or psychiatric diagnosis                          | 92 (43)                              | 48 (56)                   | .044*          |
| Language barrier                                                       | 83 (39)                              | 33 (38)                   | .95            |
| Socially isolated                                                      | 24 (11)                              | 11 (13)                   | .70            |
| Impaired mobility                                                      | 100 (47)                             | 35 (41)                   | .34            |
| Presence of home support worker                                        | 134 (63)                             | 54 (63)                   | .98            |
| <b>PCP follow-up characteristics</b>                                   |                                      |                           |                |
| PCP appointment booked prior to discharge                              | 109 (51)                             | 25 (29)                   | .001*          |

Appendix to: Lam K, Abrams HB, Matelski J, et al. Factors associated with attendance at primary care appointments after discharge from hospital: a retrospective cohort study. *CMAJ Open* 2018. DOI:10.9778/cmajo.20180069. Copyright © 2018 Joule Inc. or its licensors

|                                                                                |          |         |       |
|--------------------------------------------------------------------------------|----------|---------|-------|
| Received booking help from transitional care specialist                        | 109 (51) | 46 (53) | .69   |
| Familiar PCP                                                                   | 166 (78) | 71 (83) | .34   |
| Requested a new PCP                                                            | 58 (27)  | 20 (23) | .49   |
| Specialist appointment booked prior to discharge                               | 61 (41)  | 25 (41) | .97   |
| Weekend discharge                                                              | 26 (12)  | 5 (5.8) | .10   |
| Discharge summary:                                                             |          |         |       |
| Did not recommend PCP follow-up                                                | 42 (20)  | 17 (20) | .98   |
| Recommended PCP follow-up only                                                 | 111 (52) | 57 (66) | .024* |
| Recommended PCP follow-up and provided time but no callback number             | 41 (19)  | 5 (5.8) | .003* |
| Recommended PCP follow-up and provided callback number but no appointment time | 8 (3.7)  | 4 (4.7) | .43   |
| Recommended PCP follow-up and provided both callback number and time           | 12 (5.6) | 3 (3.5) | .45   |

**Table S3:** Sensitivity analyses, adjusted odds ratios of resulting best fit models<sup>a</sup> for patients with unknown attendance as attended and non-attended

|                                               | Included patients only |         | Unknowns as not attended |         | Unknowns as attended |         |
|-----------------------------------------------|------------------------|---------|--------------------------|---------|----------------------|---------|
|                                               | OR (95% CI)            | p-value | OR (95% CI)              | p-value | OR (95% CI)          | p-value |
| Age                                           | 1.00 (0.98-1.03)       | .74     | 1.01 (0.99-1.02)         | .60     | 1.00 (0.98-1.02)     | .74     |
| Male sex                                      | 1.15 (0.59-2.24)       | .69     | 0.97 (0.55-1.68)         | .87     | 1.37 (0.77-2.42)     | .28     |
| Charlson Comorbidity Index                    | 1.07 (0.90-1.26)       | .45     | 1.05 (0.91-1.21)         | .44     | 1.03 (0.90-1.19)     | .67     |
| ED visits in past 6 months                    |                        |         | 0.85 (0.73-0.97)         | .020*   |                      |         |
| Discharge diagnosis: CHF                      |                        |         | 0.53 (0.25-1.08)         | .074    |                      |         |
| Discharge diagnosis: COPD                     |                        |         |                          |         | 2.35 (0.83-8.47)     | .14     |
| Cognitively impaired or psychiatric diagnosis |                        |         | 0.58 (0.34-1.00)         | .057    |                      |         |

Appendix to: Lam K, Abrams HB, Matelski J, et al. Factors associated with attendance at primary care appointments after discharge from hospital: a retrospective cohort study. *CMAJ Open* 2018. DOI:10.9778/cmajo.20180069. Copyright © 2018 Joule Inc. or its licensors

|                                                                                                                                                                                                                                                                            |                               |                |                                 |                |                             |                |
|----------------------------------------------------------------------------------------------------------------------------------------------------------------------------------------------------------------------------------------------------------------------------|-------------------------------|----------------|---------------------------------|----------------|-----------------------------|----------------|
| Socially isolated                                                                                                                                                                                                                                                          |                               |                |                                 |                | 2.09<br>(0.86-<br>5.74)     | .12            |
| Presence of home support worker                                                                                                                                                                                                                                            | 0.38<br>(0.17-<br>0.80)       | .014*          | 0.57<br>(0.30-<br>1.04)         | .081           | 0.52<br>(0.27-<br>0.97)     | .045*          |
| PCP appointment booked prior to discharge                                                                                                                                                                                                                                  | 2.15<br>(1.07-<br>4.41)       | .034*          | 3.59<br>(1.73-<br>7.74)         | <.001*         |                             |                |
| Received booking help from transitional care specialist                                                                                                                                                                                                                    |                               |                | 0.52<br>(0.24-<br>1.08)         | .095           |                             |                |
| Familiar PCP                                                                                                                                                                                                                                                               | 5.6<br>(2.32-<br>15.0)        | <.001*         | 6.84<br>(2.31-<br>22.3)         | <.001*         | 7.64<br>(2.67-<br>25.9)     | <.001*         |
| Requested a new PCP                                                                                                                                                                                                                                                        |                               |                | 2.28<br>(0.91-<br>6.02)         | .088           | 2.32<br>(0.87-<br>7.41)     | .12            |
|                                                                                                                                                                                                                                                                            |                               |                |                                 |                |                             |                |
|                                                                                                                                                                                                                                                                            | <b>Included patients only</b> |                | <b>Unknowns as not attended</b> |                | <b>Unknowns as attended</b> |                |
|                                                                                                                                                                                                                                                                            | <b>OR (95% CI)</b>            | <b>p-value</b> | <b>OR (95% CI)</b>              | <b>p-value</b> | <b>OR (95% CI)</b>          | <b>p-value</b> |
| Specialist appointment booked prior to discharge                                                                                                                                                                                                                           | 0.37<br>(0.18-<br>0.75)       | .006*          | 0.41<br>(0.22-<br>0.77)         | .007*          | 0.49<br>(0.27-<br>0.89)     | .020*          |
| Recommended PCP follow-up only <sup>b</sup>                                                                                                                                                                                                                                | 1.00<br>(0.44-<br>2.25)       | 1.00           | 0.70<br>(0.34-<br>1.43)         | .32            | 1.02<br>(0.49-<br>2.07)     | .95            |
| Recommended PCP follow-up and provided time but no callback number <sup>b</sup>                                                                                                                                                                                            | 0.79<br>(0.27-<br>2.28)       | .66            | 1.11<br>(0.42-<br>2.96)         | .90            | 0.68<br>(0.28-<br>1.64)     | .85            |
| Recommended PCP follow-up and provided callback number but no appointment time <sup>b</sup>                                                                                                                                                                                | 0.97<br>(0.17-<br>5.53)       | .98            | 1.10<br>(0.23-<br>4.71)         | .83            | 1.14<br>(0.29-<br>5.10)     | .39            |
| Recommended PCP follow-up and provided both callback number and time <sup>b</sup>                                                                                                                                                                                          | 15.3<br>(2.09-<br>326)        | .021*          | 5.96<br>(1.40-<br>29.8)         | .020*          | 9.32<br>(1.47-<br>185)      | .047*          |
| <p>* p &lt; 0.05</p> <p><sup>a</sup> mixed stepwise regression based on AIC</p> <p><sup>b</sup> Reference group is discharge summary provided no instructions regarding PCP follow-up</p> <p>Shaded cells indicate the variable was dropped during stepwise regression</p> |                               |                |                                 |                |                             |                |
