# Supplementary material
Source: PubMed Central journal article supplement (PMC6277252)
Supplement: supp_6.4.E587_2018-0069-original-submission.pdf [file supp_6.4.E587_2018-0069-original-submission.pdf]

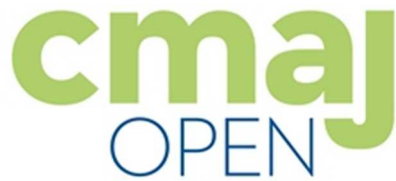

**Please see your doctor in one to two weeks... or not: A retrospective cohort study of factors associated with attendance at primary care provider appointments post-discharge**

|                               |                                                                                                                                                                                                                                                                                                                                                                                                                                                                                                                                                                                                                                                                                                                                                                                                                                                                                                                                                                                                                                                                                                                                                                                                                                                                                                                                                                                                                                                                                                                                                                                         |
|-------------------------------|-----------------------------------------------------------------------------------------------------------------------------------------------------------------------------------------------------------------------------------------------------------------------------------------------------------------------------------------------------------------------------------------------------------------------------------------------------------------------------------------------------------------------------------------------------------------------------------------------------------------------------------------------------------------------------------------------------------------------------------------------------------------------------------------------------------------------------------------------------------------------------------------------------------------------------------------------------------------------------------------------------------------------------------------------------------------------------------------------------------------------------------------------------------------------------------------------------------------------------------------------------------------------------------------------------------------------------------------------------------------------------------------------------------------------------------------------------------------------------------------------------------------------------------------------------------------------------------------|
| Journal:                      | <i>CMAJ Open</i>                                                                                                                                                                                                                                                                                                                                                                                                                                                                                                                                                                                                                                                                                                                                                                                                                                                                                                                                                                                                                                                                                                                                                                                                                                                                                                                                                                                                                                                                                                                                                                        |
| Manuscript ID                 | CMAJOpen-2018-0069                                                                                                                                                                                                                                                                                                                                                                                                                                                                                                                                                                                                                                                                                                                                                                                                                                                                                                                                                                                                                                                                                                                                                                                                                                                                                                                                                                                                                                                                                                                                                                      |
| Manuscript Type:              | Cohort (retrospective)                                                                                                                                                                                                                                                                                                                                                                                                                                                                                                                                                                                                                                                                                                                                                                                                                                                                                                                                                                                                                                                                                                                                                                                                                                                                                                                                                                                                                                                                                                                                                                  |
| Date Submitted by the Author: | 01-May-2018                                                                                                                                                                                                                                                                                                                                                                                                                                                                                                                                                                                                                                                                                                                                                                                                                                                                                                                                                                                                                                                                                                                                                                                                                                                                                                                                                                                                                                                                                                                                                                             |
| Complete List of Authors:     | Lam, Kenneth; University of Toronto, Medicine<br>Abrams, Howard; University Health Network, General Internal Medicine<br>Matelski, John; University Health Network, Department of Medicine<br>Okraimec, Karen; University Health Network, Internal Medicine                                                                                                                                                                                                                                                                                                                                                                                                                                                                                                                                                                                                                                                                                                                                                                                                                                                                                                                                                                                                                                                                                                                                                                                                                                                                                                                             |
| Keywords:                     | Health services research, Family medicine, general practice, primary care                                                                                                                                                                                                                                                                                                                                                                                                                                                                                                                                                                                                                                                                                                                                                                                                                                                                                                                                                                                                                                                                                                                                                                                                                                                                                                                                                                                                                                                                                                               |
| More Detailed Keywords:       | Continuity of care, Discharge planning                                                                                                                                                                                                                                                                                                                                                                                                                                                                                                                                                                                                                                                                                                                                                                                                                                                                                                                                                                                                                                                                                                                                                                                                                                                                                                                                                                                                                                                                                                                                                  |
| Abstract:                     | <p>Background: Follow-up with a primary care practitioner (PCP) within 1-2 weeks of discharge has been associated with reduced readmissions. We sought to determine PCP appointment attendance post-discharge and identify factors associated with attendance.</p> <p>Methods: We conducted a retrospective cohort study (n=214) of general medicine patients discharged between Sept. 1, 2014 and Dec. 30, 2015 from two Ontario academic hospitals who were advised to see a PCP within 1 week. Attendance was determined by self-report during telephone follow-up. Multivariable logistic regression was used to assess whether patient factors (e.g. comorbidity) or system factors (e.g. booking prior to discharge) predicted attendance. Cox proportional hazards modeling was used to assess whether attendance predicted 30-day readmission.</p> <p>Results: Thirty five percent attended within 1 week of discharge and 52% within 2 weeks. After adjusting for age, sex and comorbidity, significant predictors of attendance were booking prior to discharge (OR 2.14, 95% CI=1.07-4.40; P=.035), PCP familiarity (OR 5.43, 95% CI=2.25-14.1; P&lt;.001), and inclusion of a reminder, callback number and appointment time in the discharge summary (OR 15.3, 95% CI=2.09-326; P=.021). Predictors of non-attendance were the presence of a home support worker (OR 0.38, 95% CI=0.17-0.80; P=.012) and a booked specialist appointment prior to discharge (OR 0.37, 95% CI=0.18-0.73; P=.005). Attendance was not associated with reduced readmissions (HR 0.66, 95%</p> |

1  
2  
3  
4  
5  
6  
7  
8  
9  
10  
11  
12  
13  
14  
15  
16  
17  
18  
19  
20  
21  
22  
23  
24  
25  
26  
27  
28  
29  
30  
31  
32  
33  
34  
35  
36  
37  
38  
39  
40  
41  
42  
43  
44  
45  
46  
47  
48  
49  
50  
51  
52  
53  
54  
55  
56  
57  
58  
59  
60

|  |                                                                                                                                                                                                                                                                                       |
|--|---------------------------------------------------------------------------------------------------------------------------------------------------------------------------------------------------------------------------------------------------------------------------------------|
|  | CI=0.40-1.09; P=.11).<br><br>Interpretation: Timely follow-up with PCPs post-discharge remains challenging. Efforts to improve attendance should focus on organizing and coordinating follow-up before discharge, particularly for those poorly connected with the healthcare system. |
|  |                                                                                                                                                                                                                                                                                       |

SCHOLARONE™  
Manuscripts

Confidential

## STROBE Statement—checklist of items that should be included in reports of observational studies

|                              | Item No | Recommendation                                                                                                                                                                                                                                                                                                                                                                                                                                                                                                                                                                                                                                                                                                                                |
|------------------------------|---------|-----------------------------------------------------------------------------------------------------------------------------------------------------------------------------------------------------------------------------------------------------------------------------------------------------------------------------------------------------------------------------------------------------------------------------------------------------------------------------------------------------------------------------------------------------------------------------------------------------------------------------------------------------------------------------------------------------------------------------------------------|
| <b>Title and abstract</b>    | 1       | (a) Indicate the study's design with a commonly used term in the title or the abstract <a href="#">Page 1</a><br>(b) Provide in the abstract an informative and balanced summary of what was done and what was found <a href="#">Page 2</a>                                                                                                                                                                                                                                                                                                                                                                                                                                                                                                   |
| <b>Introduction</b>          |         |                                                                                                                                                                                                                                                                                                                                                                                                                                                                                                                                                                                                                                                                                                                                               |
| Background/rationale         | 2       | Explain the scientific background and rationale for the investigation being reported <a href="#">Page 3</a>                                                                                                                                                                                                                                                                                                                                                                                                                                                                                                                                                                                                                                   |
| Objectives                   | 3       | State specific objectives, including any prespecified hypotheses <a href="#">Page 4</a>                                                                                                                                                                                                                                                                                                                                                                                                                                                                                                                                                                                                                                                       |
| <b>Methods</b>               |         |                                                                                                                                                                                                                                                                                                                                                                                                                                                                                                                                                                                                                                                                                                                                               |
| Study design                 | 4       | Present key elements of study design early in the paper <a href="#">Page 5</a>                                                                                                                                                                                                                                                                                                                                                                                                                                                                                                                                                                                                                                                                |
| Setting                      | 5       | Describe the setting, locations, and relevant dates, including periods of recruitment, exposure, follow-up, and data collection <a href="#">Page 5</a>                                                                                                                                                                                                                                                                                                                                                                                                                                                                                                                                                                                        |
| Participants                 | 6       | (a) <i>Cohort study</i> —Give the eligibility criteria, and the sources and methods of selection of participants. Describe methods of follow-up <a href="#">Page 5-6</a><br><i>Case-control study</i> —Give the eligibility criteria, and the sources and methods of case ascertainment and control selection. Give the rationale for the choice of cases and controls<br><i>Cross-sectional study</i> —Give the eligibility criteria, and the sources and methods of selection of participants<br>(b) <i>Cohort study</i> —For matched studies, give matching criteria and number of exposed and unexposed <a href="#">N/A</a><br><i>Case-control study</i> —For matched studies, give matching criteria and the number of controls per case |
| Variables                    | 7       | Clearly define all outcomes, exposures, predictors, potential confounders, and effect modifiers. Give diagnostic criteria, if applicable <a href="#">Page 6</a>                                                                                                                                                                                                                                                                                                                                                                                                                                                                                                                                                                               |
| Data sources/<br>measurement | 8*      | For each variable of interest, give sources of data and details of methods of assessment (measurement). Describe comparability of assessment methods if there is more than one group <a href="#">Page 6</a>                                                                                                                                                                                                                                                                                                                                                                                                                                                                                                                                   |
| Bias                         | 9       | Describe any efforts to address potential sources of bias <a href="#">Page 6</a>                                                                                                                                                                                                                                                                                                                                                                                                                                                                                                                                                                                                                                                              |
| Study size                   | 10      | Explain how the study size was arrived at <a href="#">Page 5</a>                                                                                                                                                                                                                                                                                                                                                                                                                                                                                                                                                                                                                                                                              |
| Quantitative variables       | 11      | Explain how quantitative variables were handled in the analyses. If applicable, describe which groupings were chosen and why <a href="#">Page 7</a>                                                                                                                                                                                                                                                                                                                                                                                                                                                                                                                                                                                           |
| Statistical methods          | 12      | (a) Describe all statistical methods, including those used to control for confounding <a href="#">Page 7</a><br>(b) Describe any methods used to examine subgroups and interactions <a href="#">N/A</a><br>(c) Explain how missing data were addressed <a href="#">Page 6</a><br>(d) <i>Cohort study</i> —If applicable, explain how loss to follow-up was addressed <a href="#">Page 6</a><br><i>Case-control study</i> —If applicable, explain how matching of cases and controls was addressed<br><i>Cross-sectional study</i> —If applicable, describe analytical methods taking account of sampling strategy                                                                                                                             |

1  
2  
3  
4  
5  
6  
7  
8  
9  
10  
11  
12  
13  
14  
15  
16  
17  
18  
19  
20  
21  
22  
23  
24  
25  
26  
27  
28  
29  
30  
31  
32  
33  
34  
35  
36  
37  
38  
39  
40  
41  
42  
43  
44  
45  
46  
47  
48  
49  
50  
51  
52  
53  
54  
55  
56  
57  
58  
59  
60

(e) Describe any sensitivity analyses [Page 6](#)

Continued on next page

Confidential

**Results**

|                  |     |                                                                                                                                                                                                                                                                                                                                                                                                                                                                              |
|------------------|-----|------------------------------------------------------------------------------------------------------------------------------------------------------------------------------------------------------------------------------------------------------------------------------------------------------------------------------------------------------------------------------------------------------------------------------------------------------------------------------|
| Participants     | 13* | (a) Report numbers of individuals at each stage of study—eg numbers potentially eligible, examined for eligibility, confirmed eligible, included in the study, completing follow-up, and analysed <a href="#">Page 8</a><br>(b) Give reasons for non-participation at each stage <a href="#">Page 19</a><br>(c) Consider use of a flow diagram <a href="#">Page 19</a>                                                                                                       |
| Descriptive data | 14* | (a) Give characteristics of study participants (eg demographic, clinical, social) and information on exposures and potential confounders <a href="#">Page 20</a><br>(b) Indicate number of participants with missing data for each variable of interest <a href="#">N/A</a><br>(c) <i>Cohort study</i> —Summarise follow-up time (eg, average and total amount) <a href="#">Page 8</a>                                                                                       |
| Outcome data     | 15* | <i>Cohort study</i> —Report numbers of outcome events or summary measures over time <a href="#">Page 8</a><br><i>Case-control study</i> —Report numbers in each exposure category, or summary measures of exposure<br><i>Cross-sectional study</i> —Report numbers of outcome events or summary measures                                                                                                                                                                     |
| Main results     | 16  | (a) Give unadjusted estimates and, if applicable, confounder-adjusted estimates and their precision (eg, 95% confidence interval). Make clear which confounders were adjusted for and why they were included <a href="#">Page 8</a><br>(b) Report category boundaries when continuous variables were categorized <a href="#">N/A</a><br>(c) If relevant, consider translating estimates of relative risk into absolute risk for a meaningful time period <a href="#">N/A</a> |
| Other analyses   | 17  | Report other analyses done—eg analyses of subgroups and interactions, and sensitivity analyses <a href="#">Page 9</a>                                                                                                                                                                                                                                                                                                                                                        |

**Discussion**

|                  |    |                                                                                                                                                                                                    |
|------------------|----|----------------------------------------------------------------------------------------------------------------------------------------------------------------------------------------------------|
| Key results      | 18 | Summarise key results with reference to study objectives <a href="#">Page 11</a>                                                                                                                   |
| Limitations      | 19 | Discuss limitations of the study, taking into account sources of potential bias or imprecision. Discuss both direction and magnitude of any potential bias <a href="#">Page 13</a>                 |
| Interpretation   | 20 | Give a cautious overall interpretation of results considering objectives, limitations, multiplicity of analyses, results from similar studies, and other relevant evidence <a href="#">Page 14</a> |
| Generalisability | 21 | Discuss the generalisability (external validity) of the study results <a href="#">Page 14</a>                                                                                                      |

**Other information**

|         |    |                                                                                                                                                                                   |
|---------|----|-----------------------------------------------------------------------------------------------------------------------------------------------------------------------------------|
| Funding | 22 | Give the source of funding and the role of the funders for the present study and, if applicable, for the original study on which the present article is based <a href="#">N/A</a> |
|---------|----|-----------------------------------------------------------------------------------------------------------------------------------------------------------------------------------|

\*Give information separately for cases and controls in case-control studies and, if applicable, for exposed and unexposed groups in cohort and cross-sectional studies.

**Note:** An Explanation and Elaboration article discusses each checklist item and gives methodological background and published examples of transparent reporting. The STROBE checklist is best used in conjunction with this article (freely available on the Web sites of PLoS Medicine at <http://www.plosmedicine.org/>, Annals of Internal Medicine at <http://www.annals.org/>, and Epidemiology at <http://www.epidem.com/>). Information on the STROBE Initiative is available at [www.strobe-statement.org](http://www.strobe-statement.org).

1  
2  
3  
4  
5  
6  
7  
8 **Please see your doctor in one to two weeks... or not:**  
9 **A retrospective cohort study of factors associated with attendance at primary care**  
10 **provider appointments post-discharge**  
11

12 Kenneth Lam MD<sup>1</sup>  
13 Howard B Abrams MD<sup>1,2</sup>  
14 John Matelski MSc<sup>3</sup>  
15 Karen Okrainec MD, MSc<sup>1,2</sup>  
16

17 Affiliations:  
18

- 19  
20 1. Department of Medicine, University of Toronto, Ontario, Canada  
21 2. Division of General Internal Medicine, University Health Network, Toronto, Ontario,  
22 Canada  
23 3. Biostatistics Research Unit, University Health Network, Toronto, Ontario  
24

25  
26  
27 Corresponding Author:  
28

29 Kenneth Lam  
30 University of Toronto  
31 Sunnybrook Hospital, Room HG69  
32 2075 Bayview Avenue  
33 Toronto, ON, M4N 3M5  
34 E-mail: [kennethk.lam@mail.utoronto.ca](mailto:kennethk.lam@mail.utoronto.ca)  
35  
36

37 This research received no specific grant from any funding agency.  
38

39 There are no potential conflicts of interest relevant to this article.  
40

41  
42 Word count: 2424 (target 2500)  
43  
44  
45  
46  
47  
48  
49  
50  
51

## ABSTRACT

**Background:** Follow-up with a primary care practitioner (PCP) within 1-2 weeks of discharge has been associated with reduced readmissions. We sought to determine PCP appointment attendance post-discharge and identify factors associated with attendance.

**Methods:** We conducted a retrospective cohort study (n=214) of general medicine patients discharged between Sept. 1, 2014 and Dec. 30, 2015 from two Ontario academic hospitals who were advised to see a PCP within 1 week. Attendance was determined by self-report during telephone follow-up. Multivariable logistic regression was used to assess whether patient factors (e.g. comorbidity) or system factors (e.g. booking prior to discharge) predicted attendance. Cox proportional hazards modeling was used to assess whether attendance predicted 30-day readmission.

**Results:** Thirty five percent attended within 1 week of discharge and 52% within 2 weeks. After adjusting for age, sex and comorbidity, significant predictors of attendance were booking prior to discharge (OR 2.14, 95% CI=1.07-4.40;  $P=.035$ ), PCP familiarity (OR 5.43, 95% CI=2.25-14.1;  $P<.001$ ), and inclusion of a reminder, callback number and appointment time in the discharge summary (OR 15.3, 95% CI=2.09-326;  $P=.021$ ). Predictors of non-attendance were the presence of a home support worker (OR 0.38, 95% CI=0.17-0.80;  $P=.012$ ) and a booked specialist appointment prior to discharge (OR 0.37, 95% CI=0.18-0.73;  $P=.005$ ). Attendance was not associated with reduced readmissions (HR 0.66, 95% CI=0.40-1.09;  $P=.11$ ).

**Conclusion:** Timely follow-up with PCPs post-discharge remains challenging. Efforts to improve attendance should focus on organizing and coordinating follow-up before discharge, particularly for those poorly connected with the healthcare system.

Abstract word count: 245 (target ~250)

## BACKGROUND

With pressure to discharge patients sooner(1,2), coordinating prompt follow-up with primary care providers (PCPs) after discharge has become essential to ensure continuity of care and a safe transition. While controversy remains over whether prompt primary care follow-up is of benefit to all medical patients(3-6), some studies have found prompt follow-up helpful in reducing emergency department (ED) visits and readmissions(7-9) among patients with chronic conditions such as congestive heart failure (CHF), chronic obstructive pulmonary disease (COPD), non ST elevation myocardial infarction (NSTEMI) and cancer(10-13). Several provincial and national organizations therefore recommend follow-up within one to two weeks of hospital discharge as a measure of health care quality(14-17) and local initiatives, interventions, and incentive structures in both Canada and the US have been developed to improve the discharge and follow-up process to meet these quality standards(18-22).

Despite recommendations and attempts to improve attendance, prompt follow-up within one to two weeks of discharge remains a challenge. In Canada, 1 week follow-up rates vary between 32 and 56% depending on clinical condition and region (15,22). National Medicare claims data suggest rates are similar in the US(23). Several contributory factors have been postulated. Patients self-report forgetfulness, miscommunication and logistical barriers(24-26). Studies have shown age, socioeconomic status and rural residence produce inequities in access to primary care (4,15,23,27). Attendance is likely dependent on a combination of predisposing patient factors (clinical and functional) and



1  
2  
3 enabling system resources such as ease of booking and transportation(28), but few studies  
4  
5 have looked comprehensively at how these factors may contribute to attendance at  
6  
7 appointments after discharge. Better evidence is needed to inform quality improvement  
8  
9 projects on transitional care.  
10

11  
12 The objective of our study was therefore to determine self-reported attendance  
13  
14 rates with PCPs following discharge and to identify patient and system factors associated  
15  
16 with attendance among hospitalized medicine patients.  
17  
18  
19  
20  
21  
22  
23  
24  
25  
26  
27  
28  
29  
30  
31  
32  
33  
34  
35  
36  
37  
38  
39  
40  
41  
42  
43  
44  
45  
46  
47  
48  
49  
50  
51

## METHODS

We conducted a retrospective cohort study on patients discharged from the general medicine ward of two academic hospitals (457 and 280 beds) in Toronto, Ontario between September 2014 and December 2015. All study participants were seen in hospital by a transitional care specialist (TCS) prior to discharge and were advised to see their PCP within 7 days of discharge. The TCS received referrals from any healthcare professional attending on the hospital unit for patients felt to be at high risk of readmission, and their responsibilities included ensuring access to a PCP if the patient did not already have one, delivery of home support services, transmission of the discharge summary to the PCP, and educating the patient about the discharge plan. They followed up with patients via telephone within 14 days after discharge to record PCP attendance.

We excluded patients who died in hospital, left against medical advice, had no contact information or refused follow-up, were discharged to another care facility, or deemed at end of life. We also excluded patients who were enrolled in other transitional care initiatives, such as home visits, that might have impacted adherence to follow-up. For patients admitted multiple times during the study period, only the first admission was included.

### DATA SOURCES:

We reviewed the electronic health record for baseline characteristics including age, sex, presence of language barrier, and discharge diagnosis. We assessed comorbidity using diagnoses listed in the discharge summary to calculate a Charlson Comorbidity Index (29).

1  
2  
3 We included other characteristics that may have impacted baseline health-care access and  
4 utilization such as length of stay and emergency room visits in the past 6 months. A priori,  
5 factors that had previously been found to impact attendance and those hypothesized to  
6 were included. We recorded presence of psychiatric comorbidity, substance use disorders,  
7 cognitive impairment (diagnosed with dementia or documented cognitive testing), mobility  
8 impairment (use of cane, walker or wheelchair), social isolation (living alone and without  
9 inpatient visitors), and discharge home with support services.

10 We also included system related variables that may have impacted attendance.  
11 These included whether the PCP appointment was booked prior to discharge, whether the  
12 TCS helped with booking the appointment, the time to follow-up appointment, and whether  
13 discharge occurred on a weekend (Saturday or Sunday). We documented PCP familiarity  
14 based on self-report, and whether the patient requested a new PCP. We also noted if a  
15 specialist appointment was booked prior to discharge. Lastly, we recorded whether the  
16 discharge summary provided appointment details such as appointment time and a phone  
17 number to call should questions arise.

## 18 OUTCOMES

19 Attendance at PCP appointment was based on self-report, as recorded by the TCS  
20 during follow-up calls, and classified as attended, not attended, or unknown. We  
21 considered missed and rescheduled appointments as not attended, and, where available in  
22 the TCS notes, recorded the reason for no show. Patients for whom follow-up appointment  
23 attendance was unknown (n = 86) were excluded from the analyses. We recorded

1  
2  
3 readmissions or ED visits to either hospital within 30 days following discharge. ED visits  
4  
5 and readmissions to other hospitals were not available to be included.  
6

## 7 8 STATISTICAL ANALYSES 9

10 We compared all baseline characteristics between attendees and non-attendees  
11  
12 using chi-squared and t tests. We used stepwise multivariable logistic regression to identify  
13  
14 independent predictors of attendance with the PCP. We chose the most parsimonious  
15  
16 model based on a bi-directional step AIC modeling procedure, and further included age,  
17  
18 sex, and comorbidity to produce our final model. For each variable in the final model, we  
19  
20 report the odds ratio of attendance with 95% confidence interval, as well as the two-tailed  
21  
22 Wald test p-value against the null hypothesis that the true OR equals 1. We assessed  
23  
24 multicollinearity using variance inflation factors using a threshold value of 2 as evidence of  
25  
26 meaningful correlation. Sensitivity analyses were performed by assigning patients with  
27  
28 unknown outcome to either attended or not and repeating the above analyses. Cox  
29  
30 proportional hazards modeling was used to assess the association between nonattendance  
31  
32 and the risk of readmission, adjusted for age, sex, length of stay, comorbidity and previous  
33  
34 ED visits. In all analyses, we used  $\alpha = .05$  as the threshold for statistical significance.  
35  
36 Analyses were performed using R version 3.3.2 (The R Foundation for Statistical  
37  
38 Computing).  
39  
40  
41  
42  
43  
44

45 Ethics approval was obtained from the institutional review board of University  
46  
47 Health Network in Toronto, Ontario.  
48  
49  
50  
51

## RESULTS

Of 552 patients admitted to general internal medicine and seen by the TCS, 300 met inclusion criteria. Eighty-six patients (29%) had unknown attendance and were excluded for a final study population of 214 patients (Figure 1).

Baseline characteristics of the study population are provided (Table 1). The median age was 72.5 years and 57% were male. The most common discharge diagnoses were acute decompensated heart failure (19%), community acquired pneumonia (8.7%), and acute exacerbations of COPD (7.5%). The TCS called patients for up to an average of  $11.5 \pm 8.5$  days and median of 10 days post-discharge. A total of 168 primary care appointments were scheduled for an average of  $7.3 \pm 5.3$  days after discharge. Only 90 patients (42%) received a follow-up appointment for within 7 days. There were no significant differences in patient characteristics between patients who attended and did not attend their appointment with their PCP.

One hundred and twenty four patients (58%) attended their appointment, 75 (35%) within the first week of discharge and 112 (52%) within 2 weeks. In our final model, only system-related factors were associated with attendance. Having an appointment booked prior to discharge (OR 2.14, 95% CI = 1.07-4.40;  $P=.035$ ), a familiar PCP (OR 5.43, 95% CI = 2.25-14.1;  $P<.001$ ) and a discharge summary containing a reminder, appointment time and callback number (OR 15.3, 95% CI = 2.09-326;  $P=.021$ ) were positively correlated with attendance, whereas the presence of a home support worker (OR 0.38, 95% CI = 0.17-0.80;

1  
2  
3  $P=.012$ ) and having a specialist appointment booked prior to discharge (OR 0.37, 95% CI =  
4 0.18-0.73;  $P=.005$ ) were negatively associated with attendance (Table 2). Variance inflation  
5 factors for all variables in the final model were under 2 (Supplementary Table S1). For the  
6 90 patients who did not attend their appointment, one or more reasons for non-attendance  
7 were available for 78 (86%) of them. The reasons given ranged from patient-related factors  
8 such as feeling an appointment was not necessary (28%), forgetting to book or attend  
9 (17%), scheduling conflicts (12%), being readmitted at time of appointment (10%), or  
10 feeling unwell (4%) versus system-related factors such as transportation difficulties due to  
11 weather or otherwise (21%) and physician unavailability (10%).

12  
13  
14  
15  
16  
17  
18  
19  
20  
21  
22  
23  
24  
25  
26  
27  
28  
29  
30  
31  
32  
33  
34  
35  
36  
37  
38  
39  
40  
41  
42  
43  
44  
45  
46  
47  
48  
49  
50  
51  
52  
53  
54  
55  
56  
57  
58  
59  
60  
A total of 66 patients (31%) were readmitted within 30-days. For these 66 patients,  
time to readmission was an average of  $12.8 \pm 8.0$  and median 12 days after discharge. After  
adjusting for age, sex, length of stay, comorbidity and recent ED visits, the hazard ratio of  
readmission within 30 days was not significantly lower for patients who attended their  
primary care appointment (HR 0.66, 95% CI = 0.40-1.09;  $P=.11$ ), though trended towards  
reduced readmissions (Figure 2 and Table 3).

#### SENSITIVITY ANALYSES

Patients with unknown attendance ( $n = 86$ ) (Supplementary Table S2) had more ED  
visits in the past 6 months (1.7 vs. 1.0,  $P=.03$ ), were more likely to have cognitive  
impairment, psychiatric comorbidity or a use disorder (56 vs. 43%,  $P=.044$ ), were less  
likely to have had their PCP appointment booked prior to discharge (29 vs. 51%,  $P=.001$ )  
and their discharge summaries were less likely to contain a follow-up appointment time

1  
2  
3 (10 vs. 31%,  $P<.001$ ). When patients with unknown attendance were considered as having  
4  
5 not attended their appointment, presence of home support worker was no longer an  
6  
7 independent predictor of attendance. When patients with unknown attendance were  
8  
9 considered as having attended, booking prior to discharge was no longer predictive of  
10  
11 attendance. PCP familiarity, having a specialist appointment booked prior to discharge, and  
12  
13 providing an appointment reminder with callback number and time retained statistical  
14  
15 significance in both sensitivity analyses (Supplementary Table S3).  
16  
17  
18  
19  
20  
21  
22  
23  
24  
25  
26  
27  
28  
29  
30  
31  
32  
33  
34  
35  
36  
37  
38  
39  
40  
41  
42  
43  
44  
45  
46  
47  
48  
49  
50  
51  
52  
53  
54  
55  
56  
57  
58  
59  
60

Confidential

## CONCLUSIONS AND RELEVANCE

Achieving prompt follow-up after discharge continued to be a significant challenge for our cohort of general medicine patients. Only 35 percent of our patients attended their PCP appointment within one week of discharge, and only 52 percent within two weeks. After adjusting for baseline demographic differences, attendance was positively associated with having an appointment booked prior to discharge, self-reported PCP familiarity and written reminder provided on the discharge summary, and was negatively associated with the presence of a booked specialist appointment at discharge and the presence of a home support worker. There was a trend towards reduced readmissions for those who attended their primary care follow-up appointment, but this did not reach statistical significance. These findings suggest specific system changes may improve rates of prompt follow-up with PCPs.

Despite assistance from the TCS, the follow-up rate for our cohort was similar to provincial and national averages. Recent data from Ontario show a 7-day follow-up rate with any doctor of 35.8% for patients with COPD and 45.8% for patients with heart failure(22). In Alberta and Saskatchewan, the follow-up rate was 32-37% for all medical and surgical discharges(15). In the US, a study of 3 661 elderly patients discharged from a general medicine ward reported a 7-day follow-up rate of 27.3%(4). Studies of national Medicare data report 7-day follow-up rates of just under 40% for all patients with heart failure(10,23). Appointment availability continues to be a major obstacle in making prompt



1  
2  
3 attendance possible. Only 90 (42%) of patients received an appointment within 1 week,  
4  
5 and most (83%) who received an early appointment attended.  
6  
7

8 Previous models have suggested that attendance is a complex behaviour dictated by  
9  
10 multiple interacting components such as patient's health, perceived need, reminders, and  
11  
12 enabling resources(28). This is supported by other studies, which have found a wide  
13  
14 variety of factors associated with lower rates of follow-up after discharge: younger age,  
15  
16 longer length of stay, surgery, low income neighbourhood, rural residence, discharge home  
17  
18 with support services, discharge from a community hospital, lack of PCP familiarity, Black  
19  
20 or Hispanic race, Medicare and Medicaid insurance(4,7,15,23). We similarly found that  
21  
22 discharge home with support services and lack of PCP familiarity were associated with  
23  
24 lower rates of follow-up, though in our study, age and length of stay were not. Instead,  
25  
26 having a specialist appointment booked prior to discharge was, and this may be due to  
27  
28 patients disinterest in seeing their PCP given an alternative appointment. A similar pattern  
29  
30 was previously observed in a study of discharges from a neurosurgical ward, where  
31  
32 patients referred elsewhere were less likely to attend a follow-up neuropsychiatric  
33  
34 appointment(30) and our patients reported a lack of necessity as the main reason for non-  
35  
36 attendance. Booking the appointment prior to discharge and including a written reminder  
37  
38 with time and callback number was associated with higher rates of follow-up. There is  
39  
40 supporting causal evidence from a randomized trial that booking itself increases follow-up  
41  
42 rates by 22 percent(31), and a before-after study found that improving the information  
43  
44 given to patients before appointments improved attendance(26).  
45  
46  
47  
48  
49  
50  
51

1  
2  
3 Our study has several limitations. Our small sample size may have hindered  
4  
5 detection of an association between attendance and patient level factors found in other  
6  
7 studies. Referral criteria to the transitional care specialist were subjective and we excluded  
8  
9 patients receiving home visits and other transitional interventions, which may have  
10  
11 underestimated our attendance rate. The inherently dynamic role of transitional care  
12  
13 specialist also makes comparisons between our sites and others challenging. Our outcome  
14  
15 was based on self-report rather than objective evidence of attendance. We classified  
16  
17 rescheduled appointments as missed, though in practice, rescheduled appointments may  
18  
19 be a tolerable outcome provided the appointment can be rescheduled in the near future.  
20  
21 Lastly, our short duration of follow-up meant we had a large proportion (29%) of patients  
22  
23 with uncertain outcome who were excluded from our analyses, mostly due to  
24  
25 appointments being scheduled beyond the final call by the TCS. We conducted sensitivity  
26  
27 analyses to explore how this unknown cohort could affect our results and found that PCP  
28  
29 familiarity, specialist booking prior to discharge and providing an appointment reminder  
30  
31 with callback number and time continued to be significant factors influencing attendance.  
32  
33  
34  
35  
36  
37

38 In conclusion, rates of prompt follow-up, even with transitional care assistance, are  
39  
40 falling short of provincial and national recommendations. Our study suggests that the  
41  
42 practice of discharging patients at increased risk for readmission should be considered  
43  
44 with caution, particularly for patients with sufficient functional impairment to require  
45  
46 support services and those without a stable primary care physician. Alternative  
47  
48 arrangements, such as home visits or dedicated post-discharge follow-up clinics should be  
49  
50  
51

1  
2  
3 considered for these patients. Increased ease in scheduling prompt appointments prior to  
4 discharge through open appointment scheduling or drop-in hours for example has the  
5 promise to improve follow-up rates. Finally, as we move towards more patient-centred  
6 care, greater efforts should be made to consolidate and coordinate appointments between  
7 PCPs and specialists to minimize unnecessary visits and missed appointments.  
8  
9  
10  
11  
12  
13  
14  
15  
16  
17  
18  
19  
20  
21  
22  
23  
24  
25  
26  
27  
28  
29  
30  
31  
32  
33  
34  
35  
36  
37  
38  
39  
40  
41  
42  
43  
44  
45  
46  
47  
48  
49  
50  
51  
52  
53  
54  
55  
56  
57  
58  
59  
60

Confidential

1  
2  
3  
4  
5  
6  
7  
8  
9  
10  
11  
12  
13  
14  
15  
16  
17  
18  
19  
20  
21  
22  
23  
24  
25  
26  
27  
28  
29  
30  
31  
32  
33  
34  
35  
36  
37  
38  
39  
40  
41  
42  
43  
44  
45  
46  
47  
48  
49  
50  
51  
52  
53  
54  
55  
56  
57  
58  
59  
60

**ACKNOWLEDGEMENTS**

We would like to acknowledge Agnes Kulinek and Jhiffee Locquaio for their work as transitional care specialists without which this study would not be possible, and Peter Cram, Alina Blazer, David Frost, Robert Wu, Adalsteinn Brown and Amy Troup for their useful comments on earlier drafts of the manuscript.

Confidential

**REFERENCES**

1. Kosecoff J, Kahn KL, Rogers WH, Reinisch EJ, Sherwood MJ, Rubenstein LV, et al. Prospective payment system and impairment at discharge. The “quicker-and-sicker” story revisited. *JAMA*. 1990 Oct 17;264(15):1980–3.
2. Kaboli PJ, Go JT, Hockenberry J, Glasgow JM, Johnson SR, Rosenthal GE, et al. Associations between reduced hospital length of stay and 30-day readmission rate and mortality: 14-year experience in 129 Veterans Affairs hospitals. *Ann Intern Med*. 2012 Dec 18;157(12):837–45.
3. Grafft CA, McDonald FS, Ruud KL, Liesinger JT, Johnson MG, Naessens JM. Effect of Hospital Follow-up Appointment on Clinical Event Outcomes and Mortality. *Arch Intern Med*. American Medical Association; 2010 Jun 13;170(11):955–60.
4. Field TS, Ogarek J, Garber L, Reed G, Gurwitz JH. Association of Early Post-Discharge Follow-Up by a Primary Care Physician and 30-Day Rehospitalization Among Older Adults. *J Gen Intern Med*. 2014 Dec 2;30(5):565–71.
5. Kashiwagi DT, Burton MC, Kirkland LL, Cha S, Varkey P. Do Timely Outpatient Follow-up Visits Decrease Hospital Readmission Rates? *American Journal of Medical Quality*. 2011 Dec 30;27(1):11–5.
6. Jackson C, Shahsahebi M, Wedlake T, DuBard CA. Timeliness of Outpatient Follow-up: An Evidence-Based Approach for Planning After Hospital Discharge. *The Annals of Family Medicine*. 2015 Mar 9;13(2):115–22.
7. Misky GJ, Wald HL, Coleman EA. Post-hospitalization transitions: Examining the effects of timing of primary care provider follow-up. *J Hosp Med*. 2010 Sep;5(7):392–7.
8. Lin CY, Barnato AE, Degenholtz HB. Physician Follow-Up Visits After Acute Care Hospitalization for Elderly Medicare Beneficiaries Discharged to Noninstitutional Settings. *J Am Geriatr Soc*. 2011 Aug 30;59(10):1947–54.
9. Shen E, Koyama SY, Huynh DN, Watson HL, Mittman B, Kanter MH, et al. Association of a Dedicated Post-Hospital Discharge Follow-up Visit and 30-Day Readmission Risk in a Medicare Advantage Population. *JAMA Intern Med*. 2017 Jan 1;177(1):132–5.
10. Hernandez AF, Greiner MA, Fonarow GC, Hammill BG, Heidenreich PA, Yancy CW, et al. Relationship between early physician follow-up and 30-day readmission among

- 1  
2  
3 Medicare beneficiaries hospitalized for heart failure. *JAMA*. 2010 May  
4 5;303(17):1716–22.  
5  
6  
7 11. Sharma G, Kuo Y-F, Freeman JL, Zhang DD, Goodwin JS. Outpatient follow-up visit and  
8 30-day emergency department visit and readmission in patients hospitalized for  
9 chronic obstructive pulmonary disease. *Arch Intern Med*. 2010 Oct  
10 11;170(18):1664–70.  
11  
12 12. Guay MOD, Tanzi S, Arregui MTSM, Chisholm G, la Cruz de M, Bruera E.  
13 Characteristics and outcomes of advanced cancer patients who miss outpatient  
14 supportive care consult appointments. *Support Care Cancer*. 2014 Apr  
15 26;22(10):2869–74.  
16  
17  
18 13. Tung Y-C, Chang G-M, Chang H-Y, Yu T-H. Relationship between Early Physician  
19 Follow-Up and 30-Day Readmission after Acute Myocardial Infarction and Heart  
20 Failure. And G, editor. *PLoS ONE*. 2017 Jan 27;12(1):e0170061–20.  
21  
22 14. Albert NM, Barnason S, Deswal A. Transitions of Care in Heart Failure A Scientific  
23 Statement From the American Heart Association. *Circulation: Heart ...* 2015.  
24  
25  
26 15. CIHI. Physician Follow-Up After Hospital Discharge: Progress in Meeting Best  
27 Practices. 2015 Feb 11;:1–24.  
28  
29 16. Halasyamani L, Kripalani S, Coleman E, Schnipper J, van Walraven C, Nagamine J, et  
30 al. Transition of care for hospitalized elderly patients—Development of a discharge  
31 checklist for hospitalists. *J Hosp Med*. 2006;1(6):354–60.  
32  
33  
34 17. Hospital to Home - Quality Improvement for Institutions [Internet]. *Cardiology,*  
35 *American College of;* [cited 2016 Jul 31]. Available from:  
36 <http://cvquality.acc.org/Initiatives/H2H.aspx>  
37  
38 18. Stubbs ND, Geraci SA, Stephenson PL, Jones DB, Sanders S. Methods to reduce  
39 outpatient non-attendance. *Am J Med Sci*. 2012 Sep;344(3):211–9.  
40  
41 19. Kwan JL, Morgan MW, Stewart TE, Bell CM. Impact of an innovative inpatient patient  
42 navigator program on length of stay and 30-day readmission. *J Hosp Med*. 2015  
43 Dec;10(12):799–803.  
44  
45  
46 20. Coleman EA, Parry C, Chalmers S, Min S-J. The care transitions intervention: results  
47 of a randomized controlled trial. *Arch Intern Med*. 2006 Sep 25;166(17):1822–8.  
48  
49 21. Jack BW, Chetty VK, Anthony D, Greenwald JL, Sanchez GM, Johnson AE, et al. A  
50 reengineered hospital discharge program to decrease rehospitalization: a  
51

- 1  
2  
3 randomized trial. *Ann Intern Med.* 2009 Feb 3;150(3):178–87.  
4  
5  
6 22. Ontario HQ. *Measuring Up 2016.* 2016 Sep 16;;1–156.  
7  
8 23. DeLia D, Tong J, Gaboda D, Casalino L. Post-Discharge Follow-Up Visits and Hospital  
9 Utilization by Medicare Patient 2007–2010. *MMRR.* 2014;4(2):E1–E19.  
10  
11 24. Kaplan-Lewis E, Percac-Lima S. No-Show to Primary Care Appointments: Why  
12 Patients Do Not Come. *Journal of Primary Care & Community Health.* 2013 Sep  
13 19;4(4):251–5.  
14  
15 25. McAlister FA, Youngson E, Bakal JA, Kaul P, Ezekowitz J, van Walraven C. Impact of  
16 physician continuity on death or urgent readmission after discharge among patients  
17 with heart failure. *CMAJ.* 2013 Oct 1;185(14):E681–9.  
18  
19 26. Hardy KJ, O'Brien SV, Furlong NJ. Information given to patients before appointments  
20 and its effect on non-attendance rate. *BMJ.* 2001 Dec 1;323(7324):1298–300.  
21  
22 27. Olah ME, Gaisano G, Hwang SW. The effect of socioeconomic status on access to  
23 primary care: an audit study. *CMAJ.* 2013 Apr 2;185(6):E263–9.  
24  
25 28. Andersen RM. Revisiting the behavioral model and access to medical care: does it  
26 matter? *J Health Soc Behav.* 1995 Mar;36(1):1–10.  
27  
28 29. Charlson ME, Pompei P, Ales KL, MacKenzie CR. A new method of classifying  
29 prognostic comorbidity in longitudinal studies: development and validation. *J*  
30 *Chronic Dis.* 1987;40(5):373–83.  
31  
32 30. Mark RE, Klarenbeek PL, Rutten GJM, Sitskoorn MM. Why Don't Neurosurgery  
33 Patients Return for Neuropsychological Follow-Up? Predictors for Voluntary  
34 Appointment Keeping and Reasons for Cancellation. *The Clinical Neuropsychologist.*  
35 2014 Feb 6;28(1):49–64.  
36  
37 31. Kyriacou DN, Handel D, Stein AC, Nelson RR. BRIEF REPORT: Factors affecting  
38 outpatient follow-up compliance of emergency department patients. *J Gen Intern*  
39 *Med.* 2005 Oct;20(10):938–42.  
40  
41  
42  
43  
44  
45  
46  
47  
48  
49  
50  
51  
52  
53  
54  
55  
56  
57  
58  
59  
60

## FIGURES

Figure 1: Inclusion/exclusion criteria

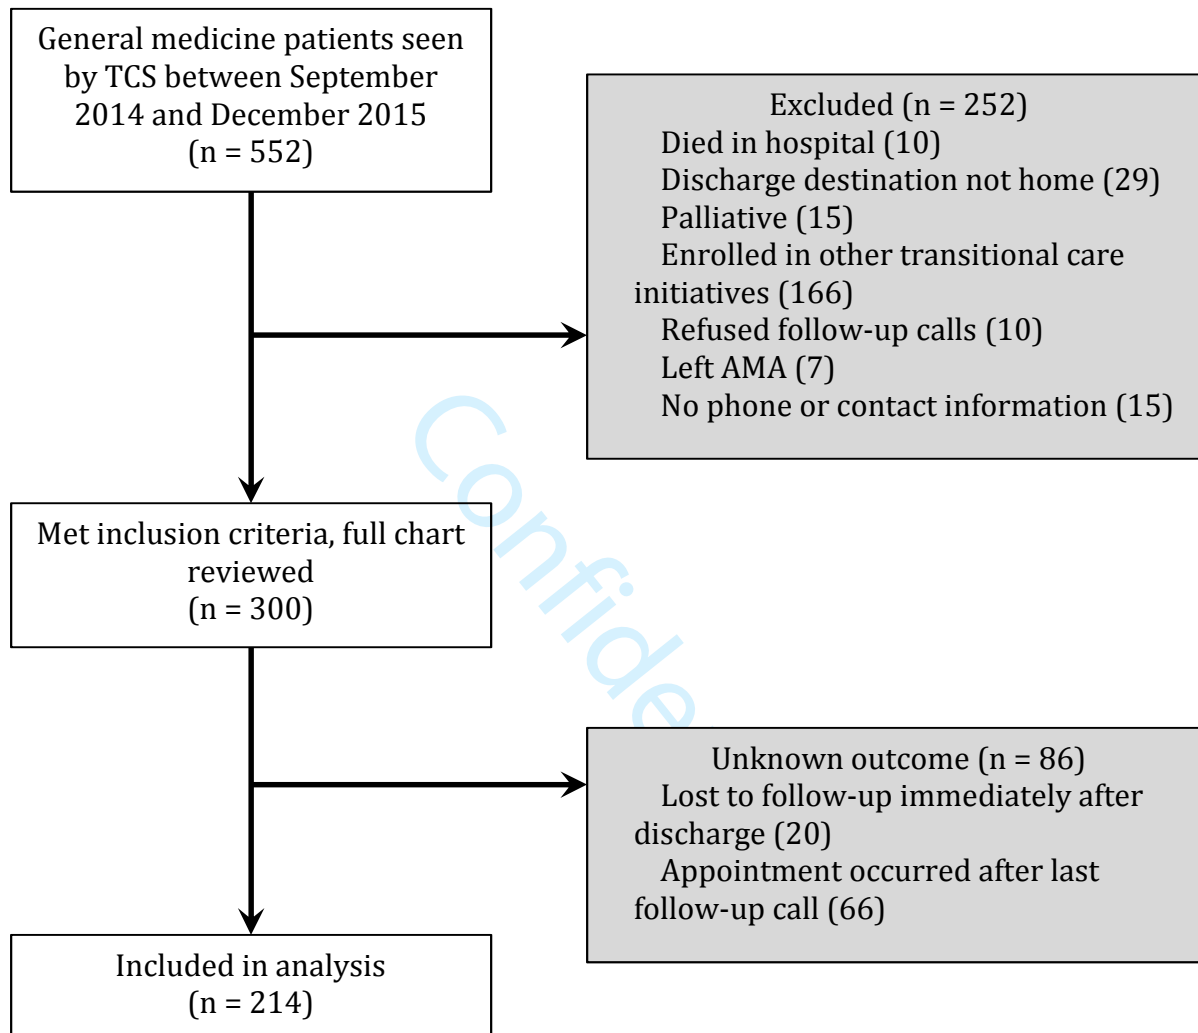



**Table 1:** Baseline characteristics of all patients who attended and who did not attend their primary care appointments (n=214)

|                                                  | Attendance at PCP appointment |                       |                         |                           |         |
|--------------------------------------------------|-------------------------------|-----------------------|-------------------------|---------------------------|---------|
|                                                  | All patients<br>n = 214       | No<br>n = 90<br>(42%) | Yes<br>n = 124<br>(58%) | Unadjusted OR<br>(95% CI) | p-value |
| <b>Patient characteristics</b>                   |                               |                       |                         |                           |         |
| Age, yr, mean $\pm$ SD                           | 70 $\pm$ 16                   | 68 $\pm$ 18           | 71 $\pm$ 15             | 1.01 (0.99-1.03)          | .32     |
| Male sex                                         | 122 (57)                      | 47 (52)               | 75 (60)                 | 1.40 (0.81-2.42)          | .23     |
| Discharge diagnosis                              |                               |                       |                         |                           |         |
| CHF                                              | 40 (19)                       | 20 (22)               | 20 (16)                 | 0.67 (0.34-1.34)          | .26     |
| CAP                                              | 18 (8.4)                      | 8 (8.9)               | 10 (8.1)                | 0.90 (0.34-2.38)          | .83     |
| COPD                                             | 16 (7.5)                      | 4 (4.4)               | 12 (9.7)                | 2.30 (0.72-7.39)          | .16     |
| Charlson Comorbidity index, mean $\pm$ SD        | 2.6 $\pm$ 2.0                 | 2.5 $\pm$ 2.0         | 2.7 $\pm$ 2.0           | 1.04 (0.91-1.19)          | .54     |
| Length of stay, d, mean $\pm$ SD (median)        | 8.6 $\pm$ 9.4 (6)             | 9.4 $\pm$ 9.6 (6)     | 8.0 $\pm$ 9.2 (5)       | 0.98 (0.96-1.01)          | .28     |
| ED visits in past 6 months, mean $\pm$ SD        | 1.0 $\pm$ 1.9                 | 1.3 $\pm$ 2.4         | 0.9 $\pm$ 1.4           | 0.89 (0.77-1.04)          | .13     |
| Cognitively impaired or psychiatric diagnosis    | 92 (43)                       | 43 (48)               | 49 (40)                 | 0.71 (0.41-1.24)          | .23     |
| Language barrier                                 | 83 (39)                       | 37 (41)               | 46 (37)                 | 0.84 (0.48-1.47)          | .55     |
| Socially isolated                                | 24 (11)                       | 7 (7.8)               | 17 (14)                 | 1.88 (0.75-4.75)          | .18     |
| Impaired mobility                                | 100 (47)                      | 46 (51)               | 54 (44)                 | 0.74 (0.43-1.27)          | .27     |
| Presence of home support worker                  | 134 (63)                      | 62 (69)               | 72 (58)                 | 0.63 (0.35-1.11)          | .11     |
| <b>System-related characteristics</b>            |                               |                       |                         |                           |         |
| PCP appointment booked prior to discharge        | 109 (51)                      | 36 (40)               | 73 (59)                 | 2.15 (1.24-3.73)          | .007    |
| Received booking help from TCS                   | 105 (51)                      | 38 (42)               | 68 (55)                 | 1.61 (0.93-2.78)          | .089    |
| Familiar PCP                                     | 166 (78)                      | 62 (69)               | 104 (84)                | 2.35 (1.22-4.52)          | .011    |
| Requested a new PCP                              | 58 (27)                       | 25 (28)               | 33 (27)                 | 0.94 (0.51-1.73)          | .85     |
| Specialist appointment booked prior to discharge | 61 (29)                       | 36 (40)               | 25 (12)                 | 0.38 (0.21-0.70)          | .002    |

|                                                                                | <b>Attendance at PCP appointment</b> |                                |                                  |                                   |                |
|--------------------------------------------------------------------------------|--------------------------------------|--------------------------------|----------------------------------|-----------------------------------|----------------|
|                                                                                | <b>All patients<br/>n = 214</b>      | <b>No<br/>n = 90<br/>(42%)</b> | <b>Yes<br/>n = 124<br/>(58%)</b> | <b>Unadjusted OR<br/>(95% CI)</b> | <b>p-value</b> |
| Weekend discharge                                                              | 26 (12)                              | 10 (11)                        | 16 (13)                          | 1.19 (0.51-2.75)                  | .69            |
| Provided no instructions regarding PCP follow-up                               | 42 (19)                              | 21 (23)                        | 21 (17)                          | 0.67 (0.34-1.32)                  | .25            |
| Recommended PCP follow-up only                                                 | 111 (52)                             | 47 (52)                        | 64 (52)                          | 0.98 (0.57-1.68)                  | .93            |
| Recommended PCP follow-up and provided time but no callback number             | 41 (19)                              | 17 (19)                        | 24 (19)                          | 1.03 (0.52-2.06)                  | .93            |
| Recommended PCP follow-up and provided callback number but no appointment time | 8 (3.7)                              | 4 (4.4)                        | 4 (3.2)                          | 0.72 (0.17-2.95)                  | .64            |
| Recommended PCP follow-up and provided both callback number and time           | 12 (5.6)                             | 1 (1.1)                        | 11 (8.8)                         | 8.66 (1.1-68.32)                  | .04            |

PCP = primary care physician

CHF = congestive heart failure, CAP = community acquired pneumonia, COPD = chronic obstructive pulmonary disease

**Table 2:** Odds ratios for characteristics included in best fit model<sup>a</sup>, adjusted for age, sex and Charlson Comorbidity Index

|                                                                                             | <b>Unadjusted OR (95% CI)</b> | <b>Unadjusted p-value</b> | <b>Adjusted OR (95% CI)</b> | <b>Adjusted p-value</b> |
|---------------------------------------------------------------------------------------------|-------------------------------|---------------------------|-----------------------------|-------------------------|
| Age                                                                                         |                               |                           | 1.01 (0.98-1.03)            | .63                     |
| Male sex                                                                                    |                               |                           | 1.20 (0.62-2.33)            | .58                     |
| Charlson Comorbidity Index                                                                  |                               |                           | 1.07 (0.91-1.26)            | .44                     |
| Presence of home support worker                                                             | 0.41 (0.20-0.82)              | .013                      | 0.38 (0.17-0.80)            | .012                    |
| PCP appointment booked prior to discharge                                                   | 2.15 (1.08-4.39)              | .031                      | 2.14 (1.07-4.40)            | .035                    |
| Familiar PCP                                                                                | 6.1 (2.62-15.3)               | <.001                     | 5.43 (2.25-14.1)            | <.001                   |
| Specialist appointment booked prior to discharge                                            | 0.36 (0.18-0.71)              | .003                      | 0.37 (0.18-0.73)            | .005                    |
| Discharge summary:                                                                          |                               |                           |                             |                         |
| Recommended PCP follow-up only <sup>b</sup>                                                 | 0.98 (0.44-2.17)              | .96                       | 1.00 (0.44-2.25)            | 1.00                    |
| Recommended PCP follow-up and provided time but no callback number <sup>b</sup>             | 0.77 (0.26-2.22)              | .63                       | 0.79 (0.27-2.28)            | .66                     |
| Recommended PCP follow-up and provided callback number but no appointment time <sup>b</sup> | 1.04 (0.18-5.88)              | .96                       | 0.97 (0.17-5.53)            | .98                     |
| Recommended PCP follow-up and provided both callback number and time <sup>b</sup>           | 15.3 (2.08-324)               | .021                      | 15.3 (2.09-326)             | .021                    |

<sup>a</sup> mixed stepwise regression based on AIC

<sup>b</sup> Reference group is discharge summary provided no instructions regarding PCP follow-up

1  
2  
3  
4  
5  
6  
7  
8  
9  
10  
11  
12  
13  
14  
15  
16  
17  
18  
19  
20  
21  
22  
23  
24  
25  
26  
27  
28  
29  
30  
31  
32  
33  
34  
35  
36  
37  
38  
39  
40  
41  
42  
43  
44  
45  
46  
47  
48  
49  
50  
51  
52  
53  
54  
55  
56  
57  
58  
59  
60

**Figure 2:** Kaplan-Meier curves for time to readmission for patients by attendance at PCP appointment<sup>a</sup>

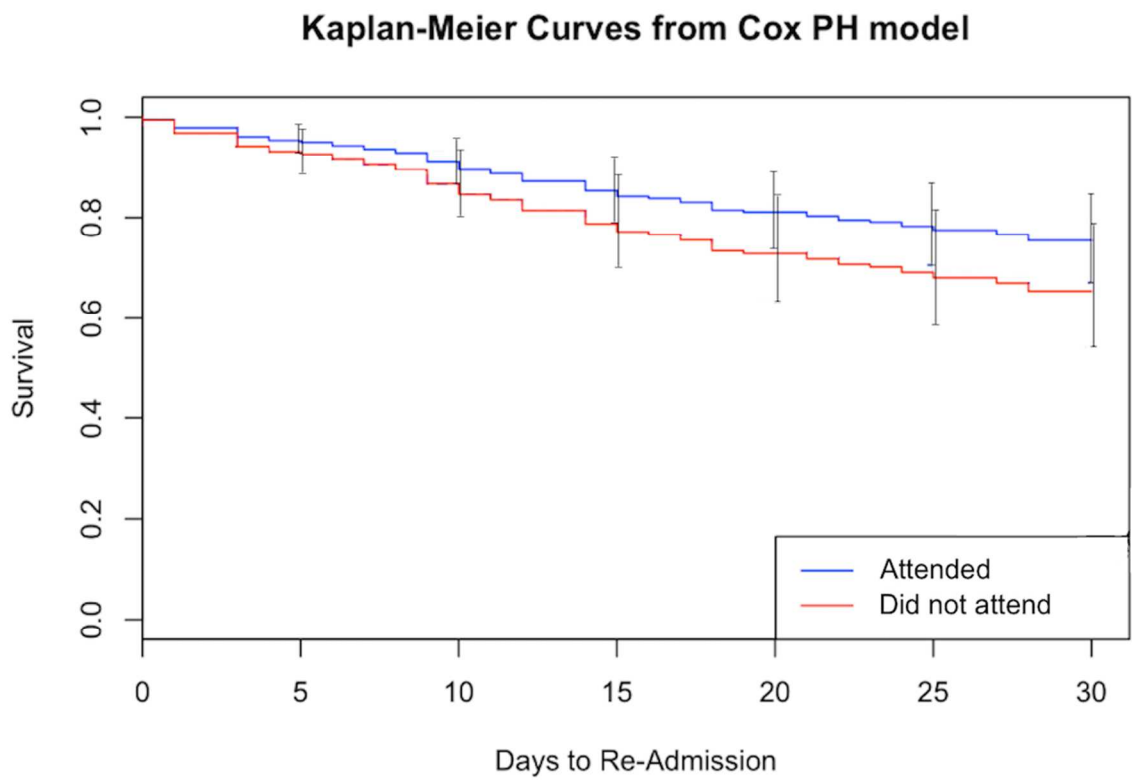

| Days to re-admission | 0   | 5   | 10  | 15  | 20  | 25  | 30  |
|----------------------|-----|-----|-----|-----|-----|-----|-----|
| Number at risk       | 214 | 201 | 188 | 173 | 162 | 155 | 148 |

<sup>a</sup> adjusted for age, sex, CCI, LOS, and ED visits in past 6 months  
Error bars indicate 95% confidence interval

**Table 3:** Hazard ratios from Cox proportional hazards model for readmission for patients by attendance

|                            | Hazard ratio     | p-value |
|----------------------------|------------------|---------|
| Attended PCP appointment   | 0.66 (0.40-1.09) | .11     |
| Age                        | 1.00 (0.76-1.31) | .96     |
| Male sex                   | 0.92 (0.54-1.56) | .76     |
| Length of stay             | 1.04 (0.83-1.31) | .72     |
| Charlson Comorbidity Index | 1.01 (0.79-1.30) | .93     |
| ED visits in past 6 months | 1.30 (1.08-1.56) | .005    |

Confidential

1  
2  
3  
4  
5  
6  
7  
8  
9  
10  
11  
12  
13  
14  
15  
16  
17  
18  
19  
20  
21  
22  
23  
24  
25  
26  
27  
28  
29  
30  
31  
32  
33  
34  
35  
36  
37  
38  
39  
40  
41  
42  
43  
44  
45  
46  
47  
48  
49  
50  
51  
52  
53  
54  
55  
56  
57  
58  
59  
60

**APPENDIX**

**Table S1:** Variance inflation factors for final model

|                                                  | <b>Variance inflation factor</b> |
|--------------------------------------------------|----------------------------------|
| Age                                              | 1.53                             |
| Male sex                                         | 1.19                             |
| Charlson Comorbidity Index                       | 1.22                             |
| Presence of home support worker                  | 1.42                             |
| PCP appointment booked prior to discharge        | 1.37                             |
| Familiar PCP                                     | 1.44                             |
| Specialist appointment booked prior to discharge | 1.12                             |
| Discharge summary reminder                       | 1.62                             |

Confidential

**Table S2:** Comparison of excluded patients with study population

| <b>Characteristic</b>                                                          | <b>Included patients<br/>n = 214</b> | <b>Unknown<br/>n = 86</b> | <b>p-value</b> |
|--------------------------------------------------------------------------------|--------------------------------------|---------------------------|----------------|
| <b>Patient characteristics</b>                                                 |                                      |                           |                |
| Age, yr, mean $\pm$ SD                                                         | 70 $\pm$ 16                          | 70 $\pm$ 17               | .88            |
| Male sex                                                                       | 122 (57)                             | 52 (60)                   | .58            |
| Discharge diagnosis                                                            |                                      |                           |                |
| CHF                                                                            | 40 (19)                              | 18 (21)                   | .66            |
| CAP                                                                            | 18 (8.4)                             | 2 (2.3)                   | .056           |
| COPD                                                                           | 16 (7.5)                             | 11 (13)                   | .15            |
| Charlson Comorbidity index, mean $\pm$ SD                                      | 2.6 $\pm$ 2.0                        | 2.7 $\pm$ 2.0             | .91            |
| Length of stay, d, mean $\pm$ SD (median)                                      | 8.6 $\pm$ 9.4 (6)                    | 6.9 $\pm$ 5.1<br>(5.5)    | .12            |
| ED visits in past 6 months, mean $\pm$ SD                                      | 1.0 $\pm$ 1.9                        | 1.7 $\pm$ 2.6             | .029*          |
| Cognitively impaired or psychiatric diagnosis                                  | 92 (43)                              | 48 (56)                   | .044*          |
| Language barrier                                                               | 83 (39)                              | 33 (38)                   | .95            |
| Socially isolated                                                              | 24 (11)                              | 11 (13)                   | .70            |
| Impaired mobility                                                              | 100 (47)                             | 35 (41)                   | .34            |
| Presence of home support worker                                                | 134 (63)                             | 54 (63)                   | .98            |
| <b>PCP follow-up characteristics</b>                                           |                                      |                           |                |
| PCP appointment booked prior to discharge                                      | 109 (51)                             | 25 (29)                   | .001*          |
| Received booking help from TCS                                                 | 109 (51)                             | 46 (53)                   | .69            |
| Familiar PCP                                                                   | 166 (78)                             | 71 (83)                   | .34            |
| Requested a new PCP                                                            | 58 (27)                              | 20 (23)                   | .49            |
| Specialist appointment booked prior to discharge                               | 61 (41)                              | 25 (41)                   | .97            |
| Weekend discharge                                                              | 26 (12)                              | 5 (5.8)                   | .10            |
| Discharge summary:                                                             |                                      |                           |                |
| Did not recommend PCP follow-up                                                | 42 (20)                              | 17 (20)                   | .98            |
| Recommended PCP follow-up only                                                 | 111 (52)                             | 57 (66)                   | .024*          |
| Recommended PCP follow-up and provided time but no callback number             | 41 (19)                              | 5 (5.8)                   | .003*          |
| Recommended PCP follow-up and provided callback number but no appointment time | 8 (3.7)                              | 4 (4.7)                   | .43            |
| Recommended PCP follow-up and provided both callback number and time           | 12 (5.6)                             | 3 (3.5)                   | .45            |

**Table S3:** Sensitivity analyses, adjusted odds ratios of resulting best fit models<sup>a</sup> for patients with unknown attendance as attended and non-attended

|                                               | Included patients only |         | Unknowns as not attended |         | Unknowns as attended |         |
|-----------------------------------------------|------------------------|---------|--------------------------|---------|----------------------|---------|
|                                               | OR (95% CI)            | p-value | OR (95% CI)              | p-value | OR (95% CI)          | p-value |
| Age                                           | 1.00<br>(0.98-1.03)    | .74     | 1.01<br>(0.99-1.02)      | .60     | 1.00<br>(0.98-1.02)  | .74     |
| Male sex                                      | 1.15<br>(0.59-2.24)    | .69     | 0.97<br>(0.55-1.68)      | .87     | 1.37<br>(0.77-2.42)  | .28     |
| Charlson Comorbidity Index                    | 1.07<br>(0.90-1.26)    | .45     | 1.05<br>(0.91-1.21)      | .44     | 1.03<br>(0.90-1.19)  | .67     |
| ED visits in past 6 months                    |                        |         | 0.85<br>(0.73-0.97)      | .020*   |                      |         |
| Discharge diagnosis: CHF                      |                        |         | 0.53<br>(0.25-1.08)      | .074    |                      |         |
| Discharge diagnosis: COPD                     |                        |         |                          |         | 2.35<br>(0.83-8.47)  | .14     |
| Cognitively impaired or psychiatric diagnosis |                        |         | 0.58<br>(0.34-1.00)      | .057    |                      |         |
| Socially isolated                             |                        |         |                          |         | 2.09<br>(0.86-5.74)  | .12     |
| Presence of home support worker               | 0.38<br>(0.17-0.80)    | .014*   | 0.57<br>(0.30-1.04)      | .081    | 0.52<br>(0.27-0.97)  | .045*   |
| PCP appointment booked prior to discharge     | 2.15<br>(1.07-4.41)    | .034*   | 3.59<br>(1.73-7.74)      | <.001*  |                      |         |
| Received booking help from TCS                |                        |         | 0.52<br>(0.24-1.08)      | .095    |                      |         |
| Familiar PCP                                  | 5.6 (2.32-15.0)        | <.001*  | 6.84<br>(2.31-22.3)      | <.001*  | 7.64<br>(2.67-25.9)  | <.001*  |
| Requested a new PCP                           |                        |         | 2.28<br>(0.91-6.02)      | .088    | 2.32<br>(0.87-7.41)  | .12     |
|                                               |                        |         |                          |         |                      |         |



|                                                                                             | Included patients only |         | Unknowns as not attended |         | Unknowns as attended |         |
|---------------------------------------------------------------------------------------------|------------------------|---------|--------------------------|---------|----------------------|---------|
|                                                                                             | OR (95% CI)            | p-value | OR (95% CI)              | p-value | OR (95% CI)          | p-value |
| Specialist appointment booked prior to discharge                                            | 0.37<br>(0.18-0.75)    | .006*   | 0.41<br>(0.22-0.77)      | .007*   | 0.49<br>(0.27-0.89)  | .020*   |
| Recommended PCP follow-up only <sup>b</sup>                                                 | 1.00<br>(0.44-2.25)    | 1.00    | 0.70<br>(0.34-1.43)      | .32     | 1.02<br>(0.49-2.07)  | .95     |
| Recommended PCP follow-up and provided time but no callback number <sup>b</sup>             | 0.79<br>(0.27-2.28)    | .66     | 1.11<br>(0.42-2.96)      | .90     | 0.68<br>(0.28-1.64)  | .85     |
| Recommended PCP follow-up and provided callback number but no appointment time <sup>b</sup> | 0.97<br>(0.17-5.53)    | .98     | 1.10<br>(0.23-4.71)      | .83     | 1.14<br>(0.29-5.10)  | .39     |
| Recommended PCP follow-up and provided both callback number and time <sup>b</sup>           | 15.3<br>(2.09-326)     | .021*   | 5.96<br>(1.40-29.8)      | .020*   | 9.32<br>(1.47-185)   | .047*   |

\*  $p < 0.05$

<sup>a</sup> mixed stepwise regression based on AIC

<sup>b</sup> Reference group is discharge summary provided no instructions regarding PCP follow-up  
Shaded cells indicate the variable was dropped during stepwise regression
